# Supplementary material for: Poly(Aspartic Acid) Functionalized Poly(ϵ-Caprolactone) Microspheres with Enhanced Hydroxyapatite Affinity as Bone Targeting Antibiotic Carriers
Source: MDPI journal article supplement (doi:10.3390/pharmaceutics12090885), 2020-09-17
Supplement: s1 [file s1]

# Supplementary materials: Poly(Aspartic Acid) Functionalized Poly( $\epsilon$ -Caprolactone) Microspheres with Enhanced Hydroxyapatite Affinity as Bone Targeting Antibiotic Carriers

Stijn G. Rotman, Thomas F. Moriarty, Benjamin Nottelet, Dirk W. Grijpma, David Eglin and Olivier Guillaume

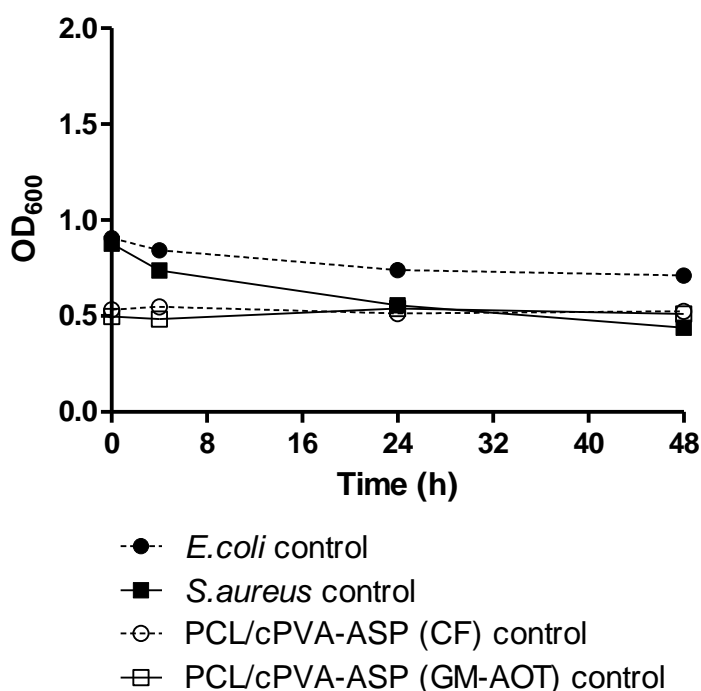

**Figure S1.** OD<sub>600</sub> measurements of bacterial suspensions and antibiotic loaded PCL/cPVA-ASP microsphere dispersions over 48 hours.

OD<sub>600</sub> of bacterial dispersions is slightly reduced over 48 hours in nutrient-poor PBS but is relatively stable for straightforward interpretation of antimicrobial effects of antibiotic loaded microsphere treatments. Dispersions of antibiotic loaded PCL/cPVA-ASP microspheres remain at a constant OD<sub>600</sub> over the course of the experiment, simplifying interpretation of mixed dispersions of bacteria and microspheres in Figure 5.
